# Supplementary material
Source: publisher site journal article supplement (https://www.dovepress.com/get_supplementary_file.php?f=332732.docx)
Supplement: Supplementary file 1 [file get_supplementary_file.php]

APOH

APP

CCND2

COL3A1

COL5A2

CXCL6

FGFR1

FSTL1

ITGAV

JAG1

JAG2

KCNJ8

LPL

LRPAP1

LUM

MSX1

NRP1

OLR1

PDGFA

PF4

PGLYRP1

POSTN

PRG2

PTK2

S100A4

SERPINA5

SLCO2A1

SPP1

STC1

THBD

TIMP1

TNFRSF21

VAV2

VCAN

VEGFA

VTN
